# Supplementary material
Source: PubMed Central journal article supplement (PMC2649680)
Supplement: NIHMS91148-supplement-1_si_001.pdf [file NIHMS91148-supplement-1_si_001.pdf]

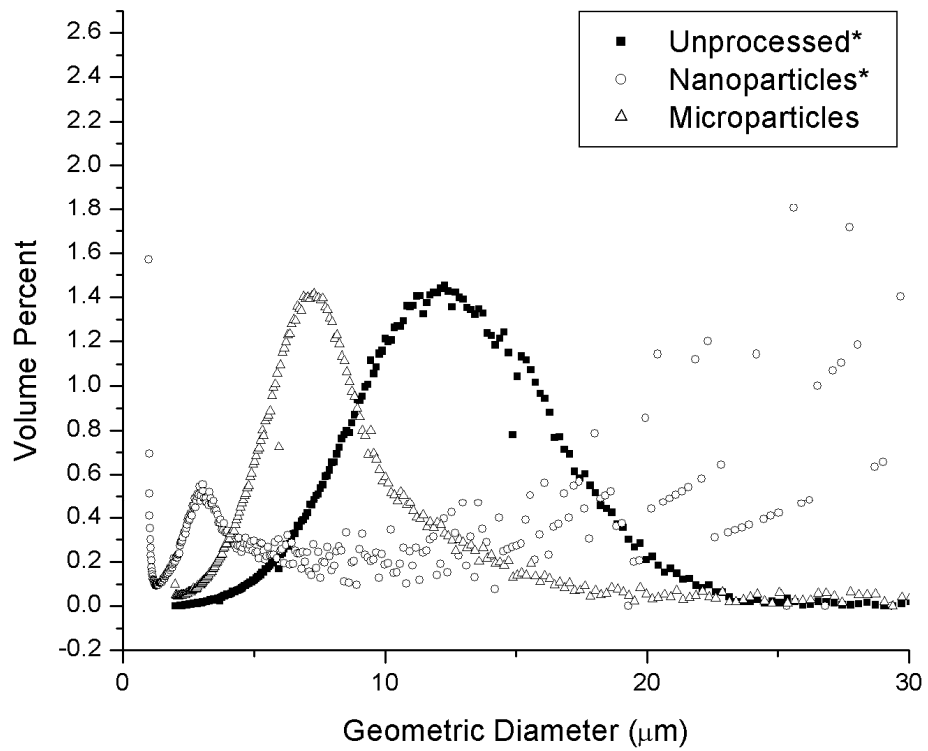

Supplementary Figure 1

Geometric diameter distributions of the suspended insulin particles. Samples marked with an \* were lyophilized and resuspended in aqueous solution before measuring.
